# Supplementary material
Source: Elsevier journal article supplement (https://www.sciencedirect.com/science/article/pii/S2173572722002636)

**Supplementary figure 1:** Accuracy of the HR-QI %tVTot multivariate analysis of 77.94% and an AUC curve of 0.81 (0.74-0.86).

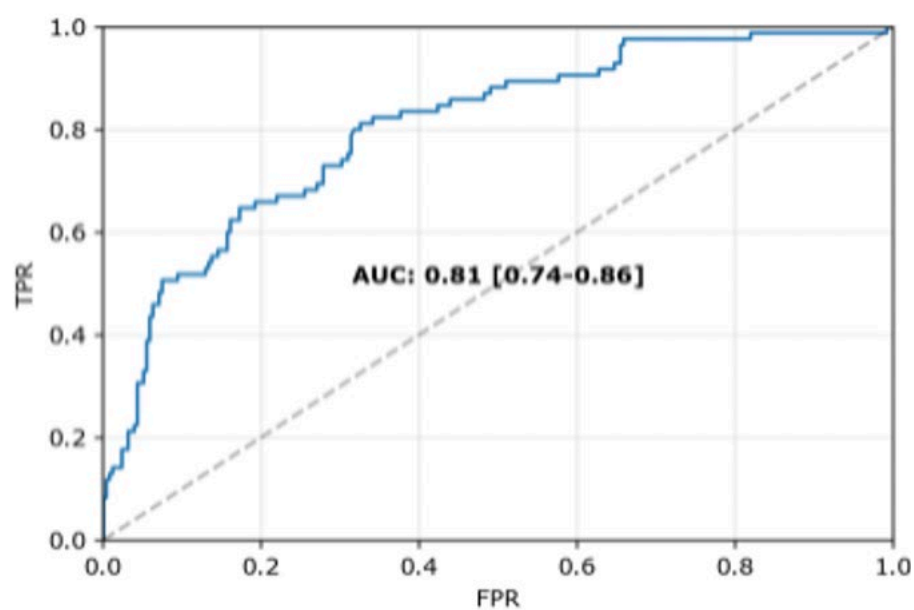

**Supplementary figure 2:** Accuracy of HR-QI %pVTa multivariate analysis of 80.59% and an AUC curve of 0.82 (0.76-0.87)

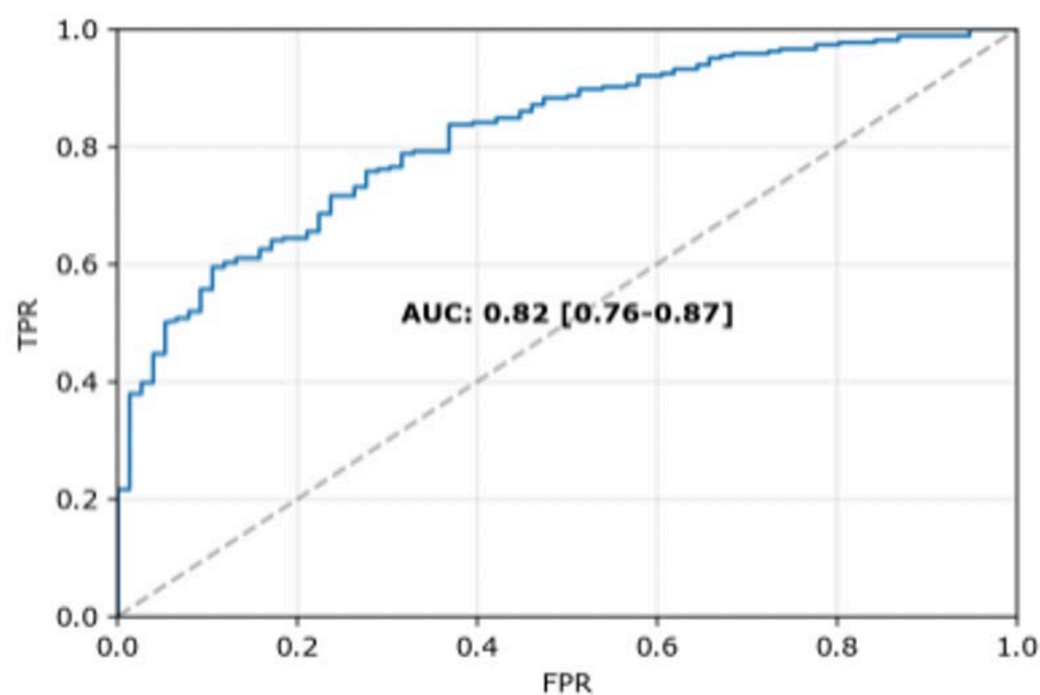

*Supplementary figure 3: Multivariate mortality analysis.* Only age was independently associated with mortality in the multivariate analysis.

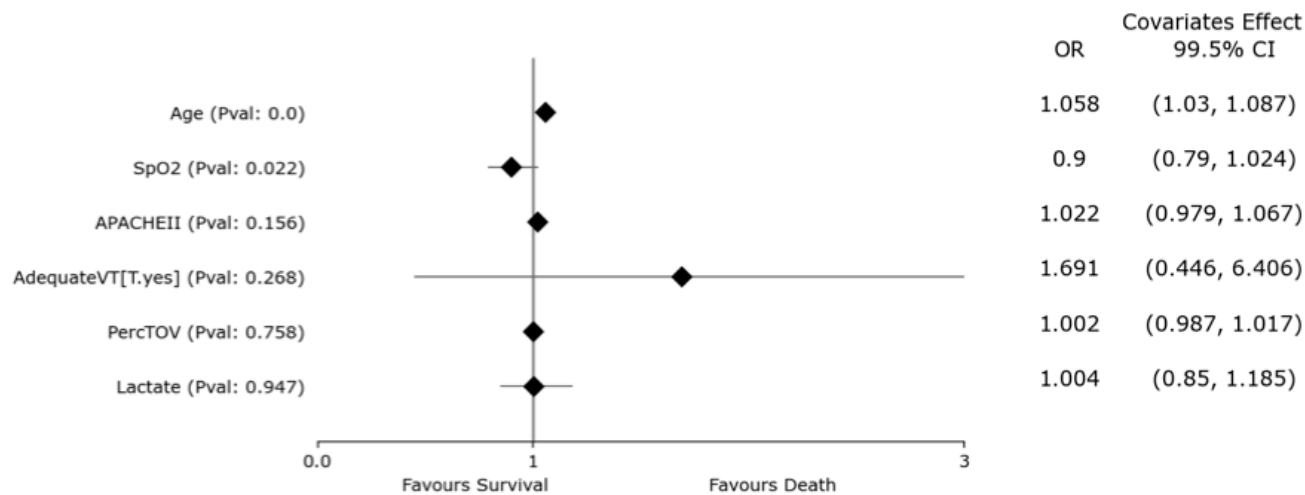

*Supplementary figure 4:* Accuracy of multivariate mortality analysis of 67.94% and an AUC curve

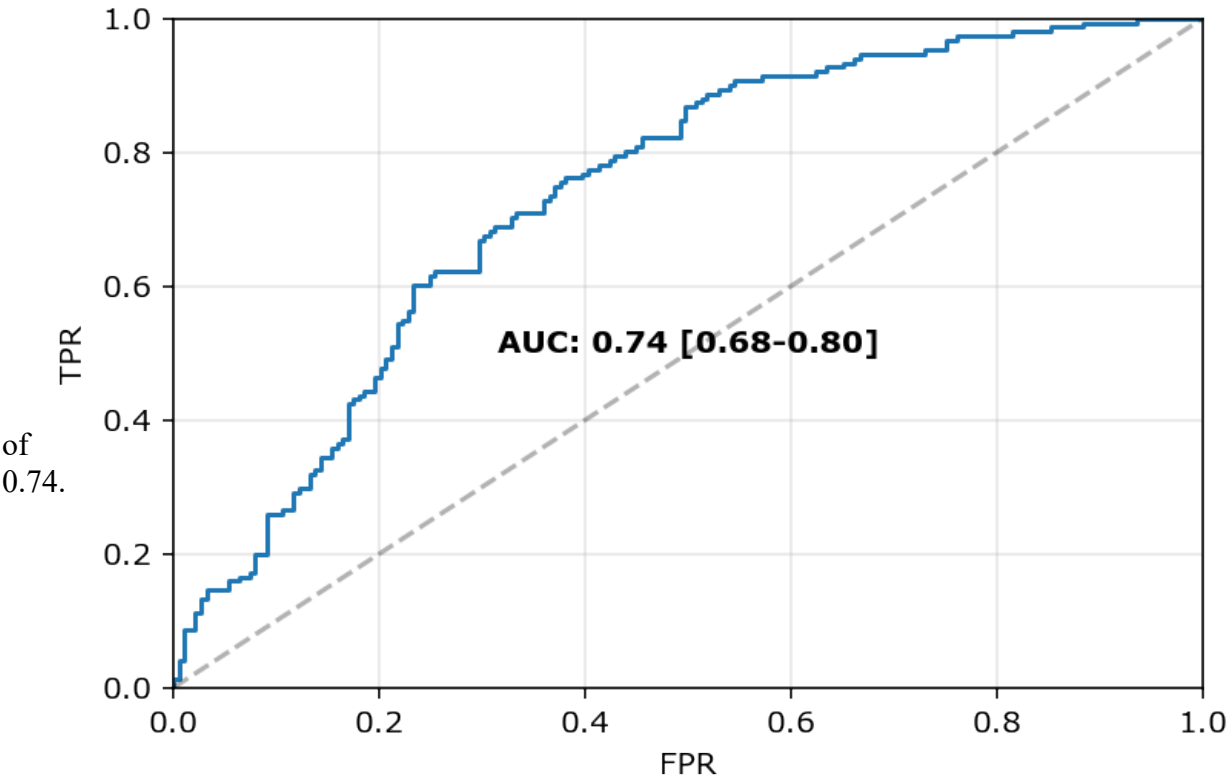

Supplement: mmc1 [file S2173572722002636:mmc1.pdf]
